# Supplementary material
Source: HighWire-hosted journal article supplement (https://bjo.bmj.com/content/104/4/529)
Supplement: inline-supplementary-material-1 [file inline-supplementary-material-1.pdf]

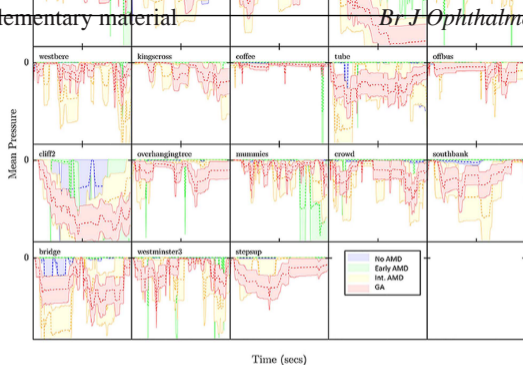

Supplementary File 1: Mean (standard error [SE]) BB response (dotted line = mean; solid lines = SE) across each of the eighteen videos stratified by AMD classification according to the better-seeing eye.
